# Supplementary material for: Effects of Fructose and Oligofructose Addition on Milk Fermentation Using Novel Lactobacillus Cultures to Obtain High-Quality Yogurt-like Products
Source: MDPI journal article supplement (doi:10.3390/molecules26195730), 2021-09-22
Supplement: s1 [file s1]

## Supplementary Materials

**Table S1.** Sensory attribute for fermented milk samples profiling, their definitions and intensity range.

| Attributes               | Definitions                                                                                     | Intensity range          |
|--------------------------|-------------------------------------------------------------------------------------------------|--------------------------|
| Milky-fermentative smell | Mild smell characteristic of lactic fermentation of products such as yoghurt, sour milk         | none - very intensive    |
| Sterilization smell      | The smell characteristic of boiled milk                                                         | none - very intensive    |
| Sweet smell              | Basic odour quality - no definition required                                                    | none - very intensive    |
| Irritating smell         | smell with an unpleasant, irritating sensation when the sample is spread in the mouth           | none - very intensive    |
| Other smell              | smell not matching the above-mentioned                                                          | none - very intensive    |
| Color tone               | Colour intensity of the product                                                                 | light white - dark cream |
| Density                  | Perception of the product's density in the mouth                                                | thin - thick             |
| Smoothness               | Degree of smoothness in the product's surface (grainy/ smooth appearance)                       | rough - smooth           |
| Viscosity                | Feeling of sticking to the palate, ductility                                                    | low-high                 |
| Milky-fermentative taste | Mild taste characteristic of lactic fermentation of products such as yoghurt, sour milk         | none - very intensive    |
| Sterilization taste      | The taste characteristic of boiled milk                                                         | none - very intensive    |
| Sour taste               | Basic taste quality - no definition required                                                    | none - very intensive    |
| Sweet taste              | Basic taste quality - no definition required                                                    | none - very intensive    |
| Salty taste              | Basic taste quality - no definition required                                                    | none - very intensive    |
| Bitter taste             | Basic taste quality - no definition required                                                    | none - very intensive    |
| Floury taste             | Characteristic for the taste of flour dissolved in water                                        | none - very intensive    |
| Irritating smell         | Taste with an unpleasant, irritating sensation when the sample is spread in the mouth           | none - very intensive    |
| Other smell              | Taste not matching the above-mentioned                                                          | none - very intensive    |
| Overall quality          | Overall impression of the harmony of positive attributes, with no or only slight negative notes | low-high                 |
